# Supplementary material for: The Initial Response of a Eukaryotic Replisome to DNA Damage
Source: PubMed Central journal article supplement (PMC6024075; doi:10.1016/j.molcel.2018.04.022), 2018-06-21
Supplement: mmc1.pdf [file mmc1.pdf]

**Molecular Cell, Volume 70**

**Supplemental Information**

**The Initial Response of a Eukaryotic  
Replisome to DNA Damage**

**Martin R.G. Taylor and Joseph T.P. Yeeles**

**Figure S1**

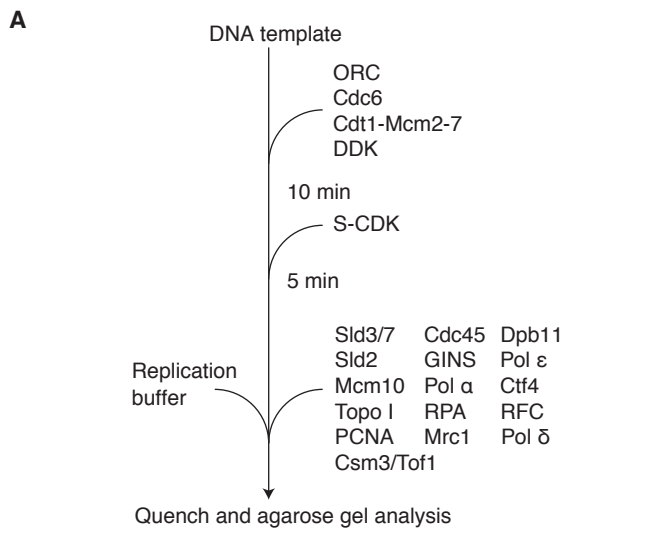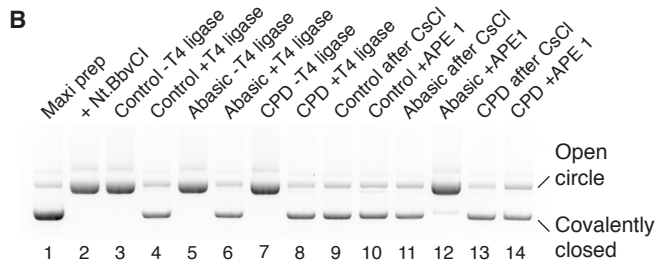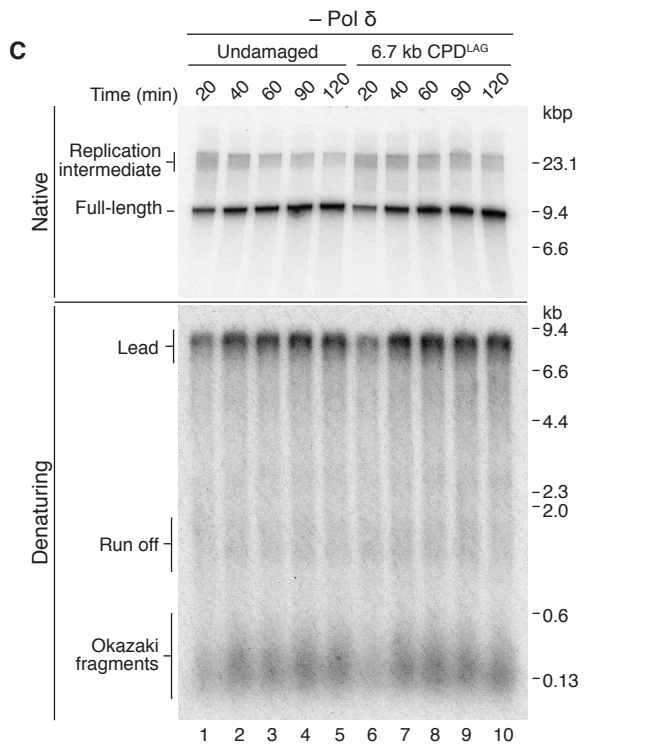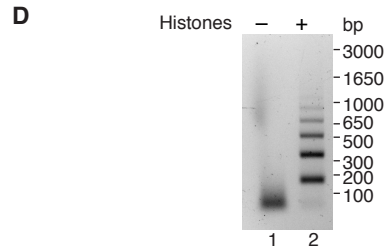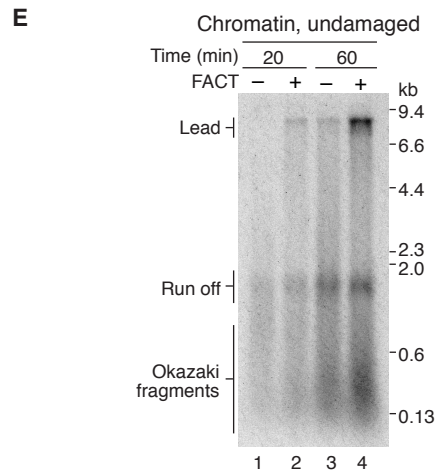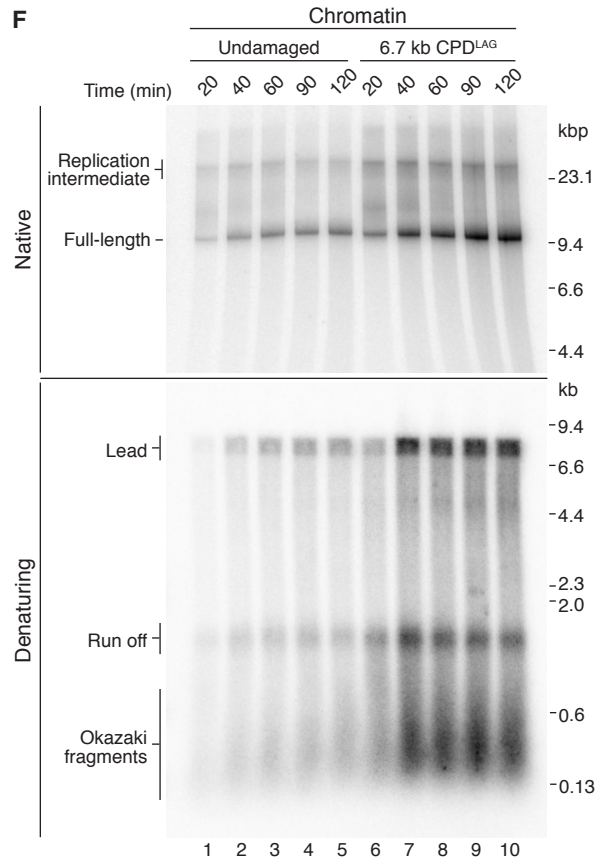

**Figure S2****A**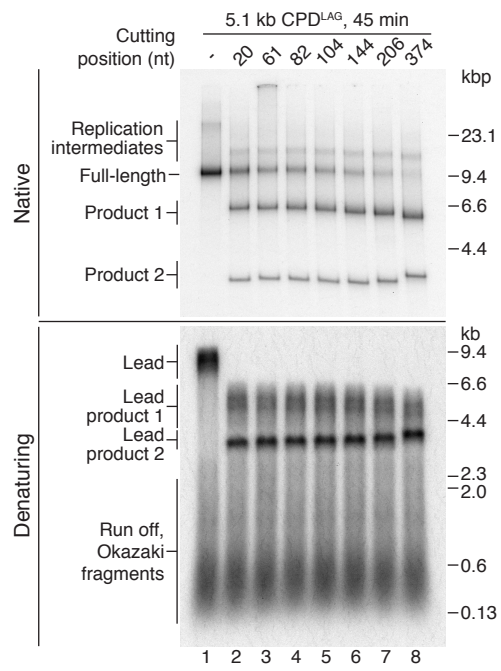**B**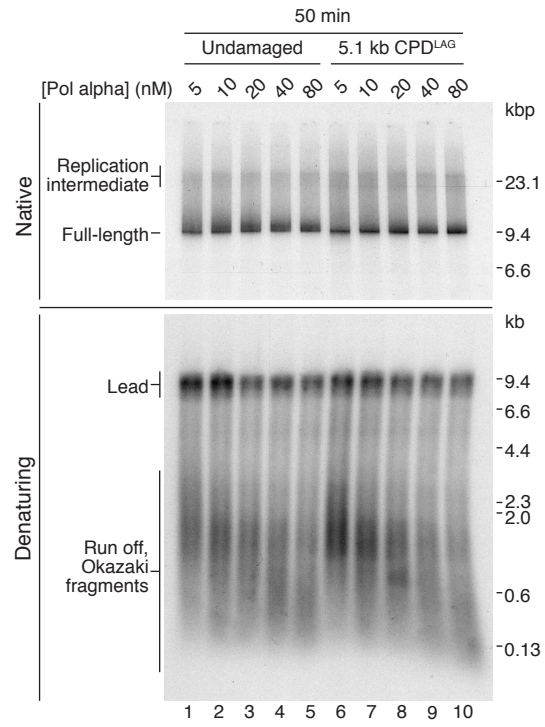

**Figure S3**

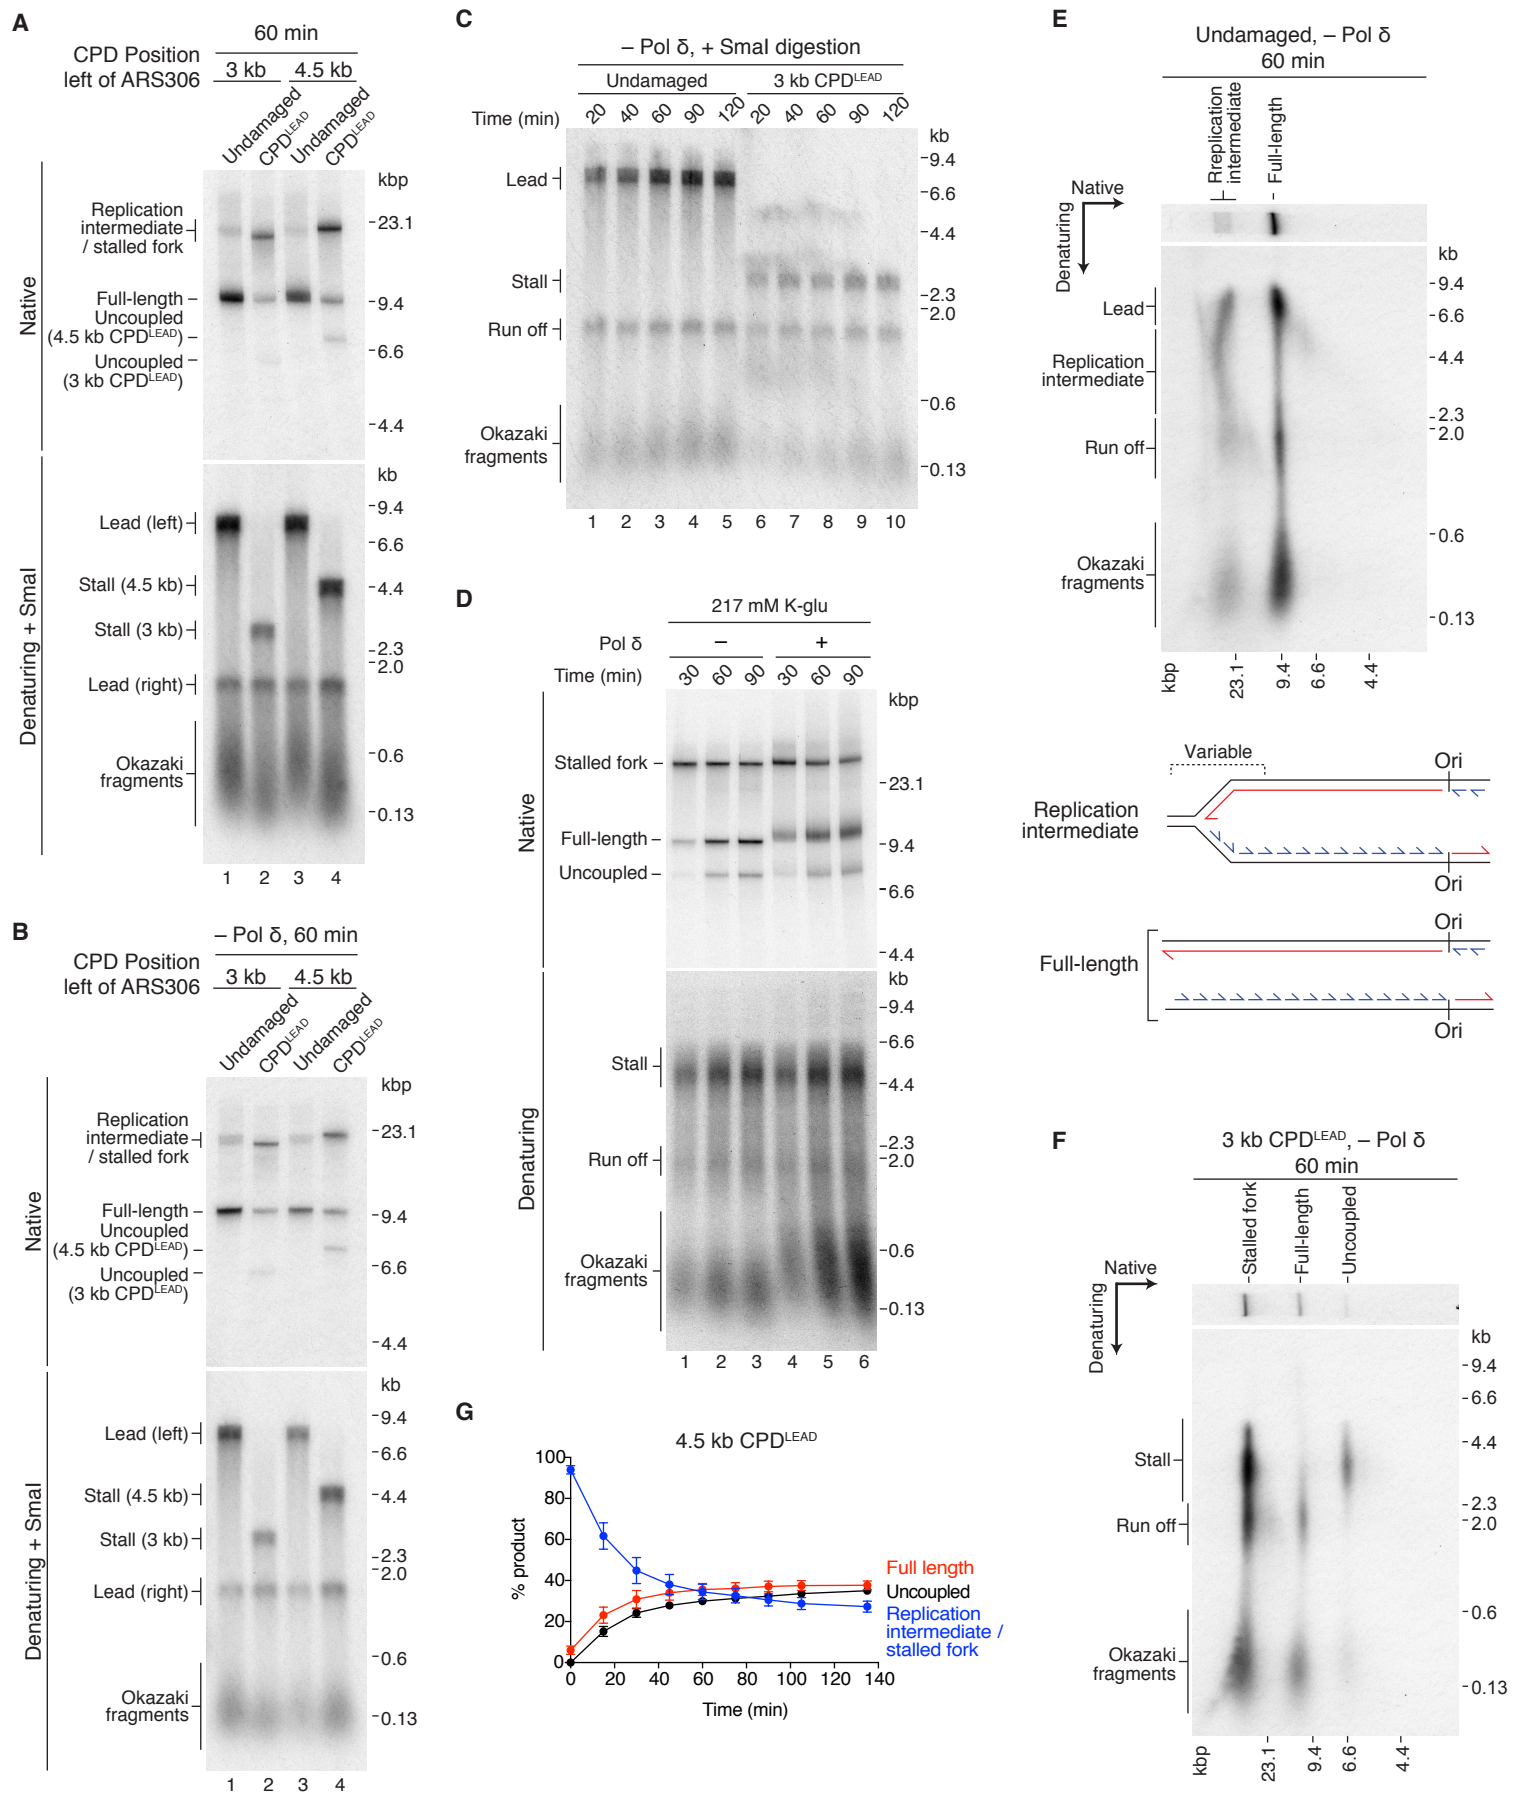



**Figure S4**

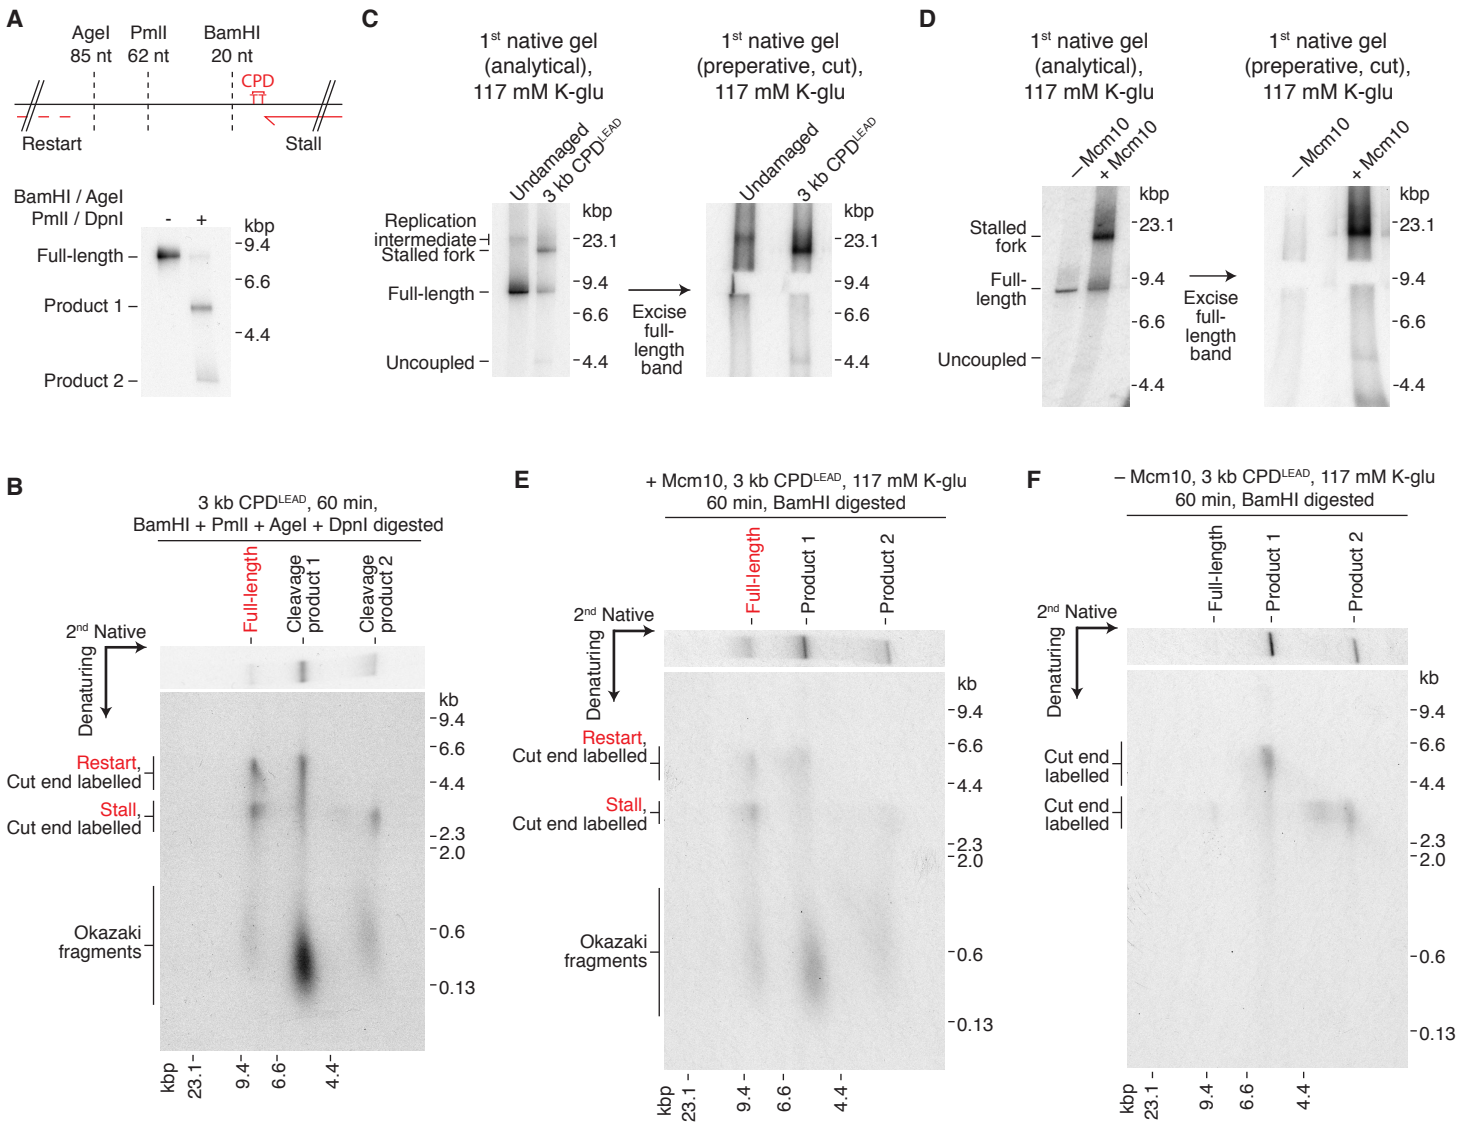

**Figure S5**

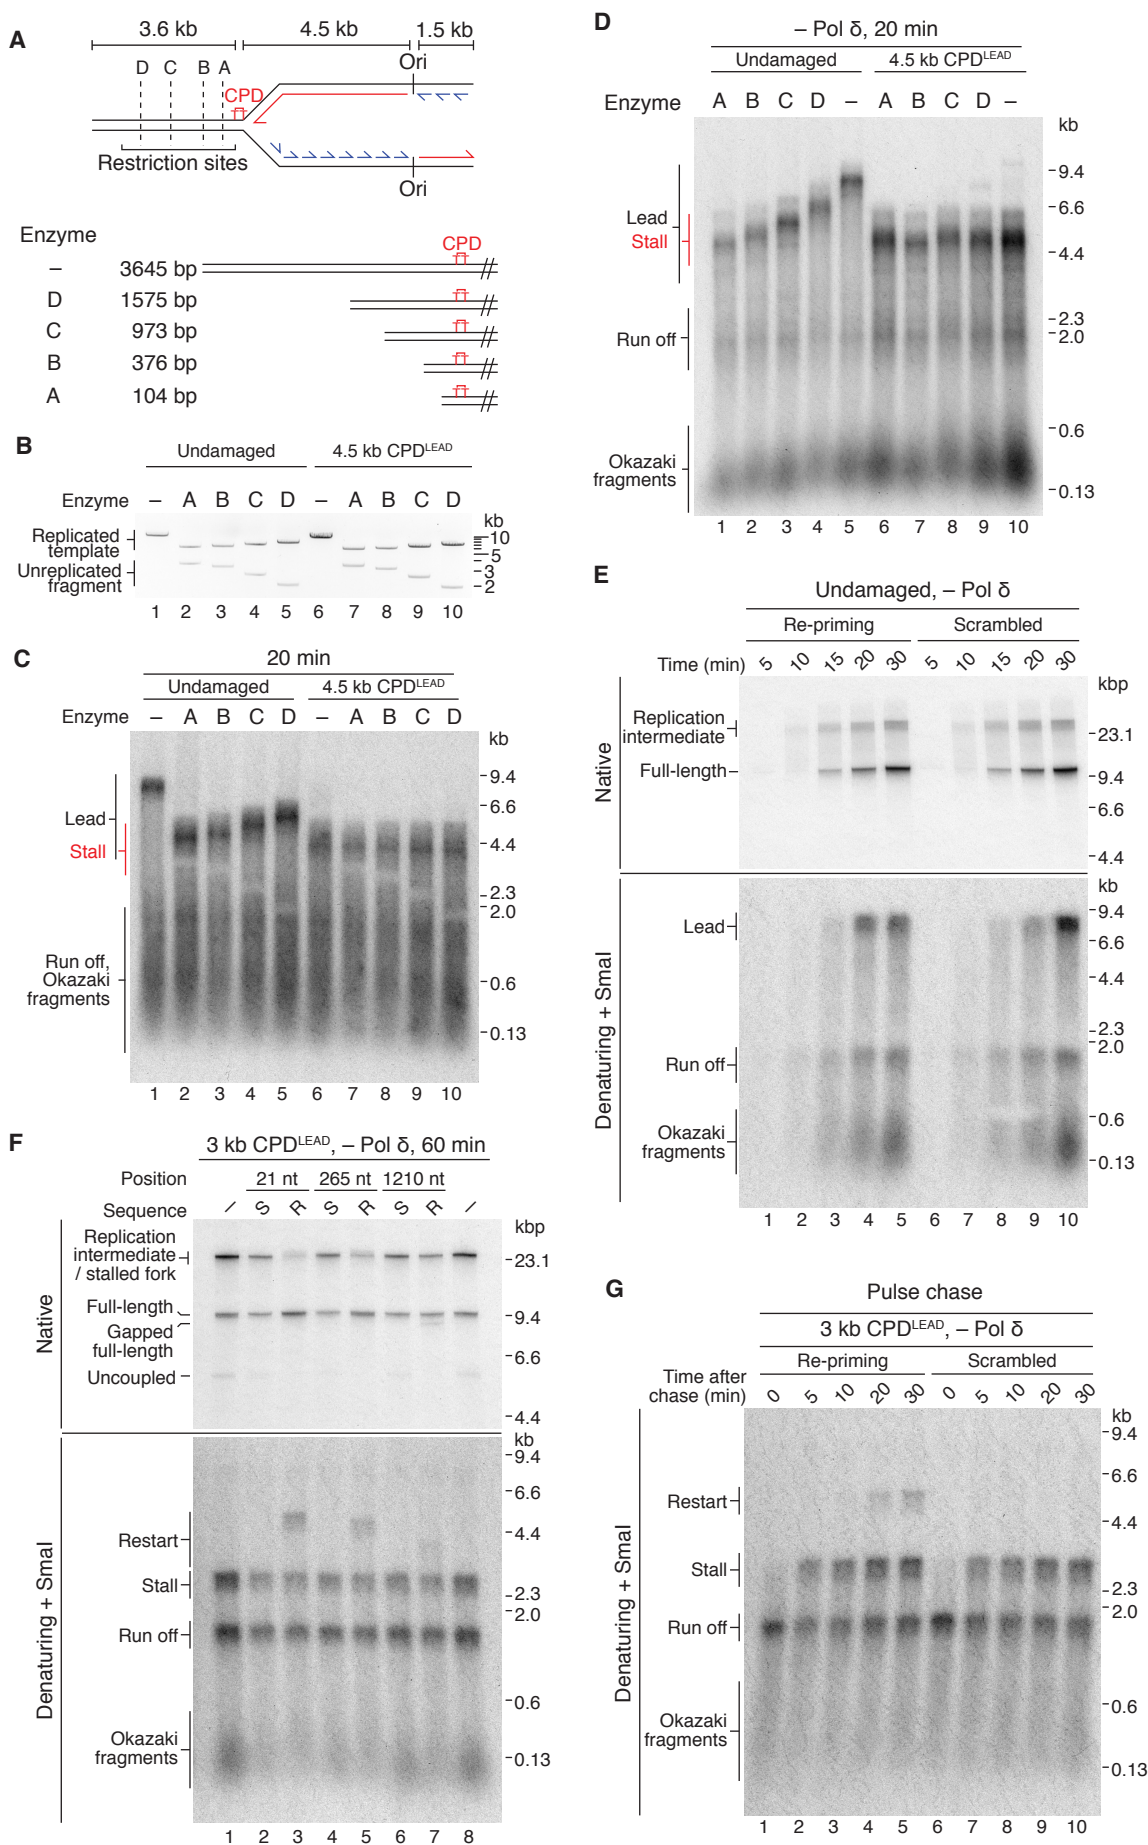

**Figure S6**

**A**

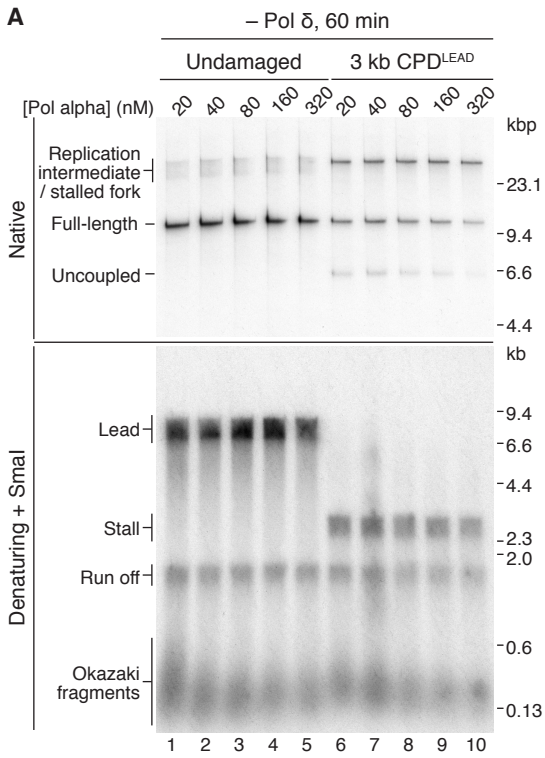

**B**

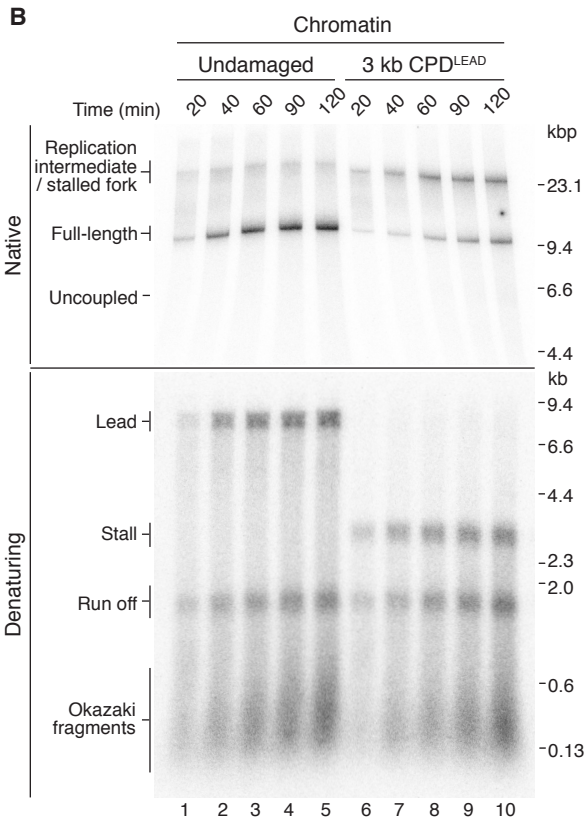

**C**

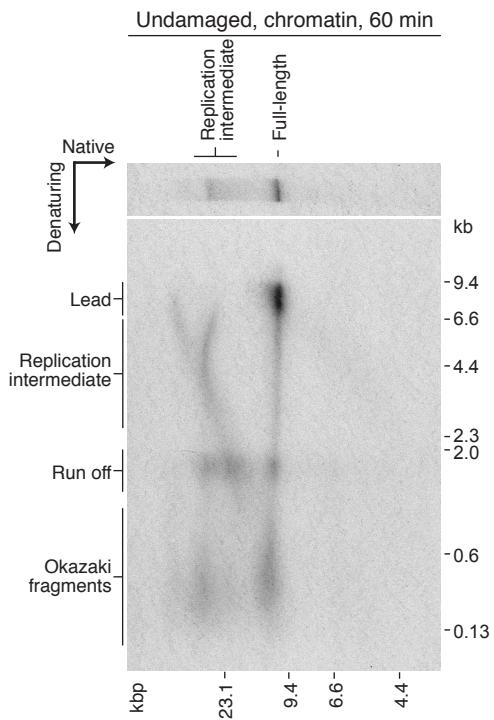

**D**

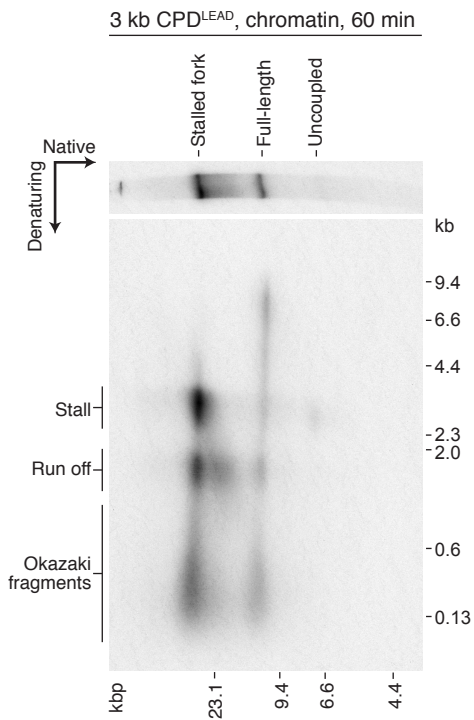



**Figure S7**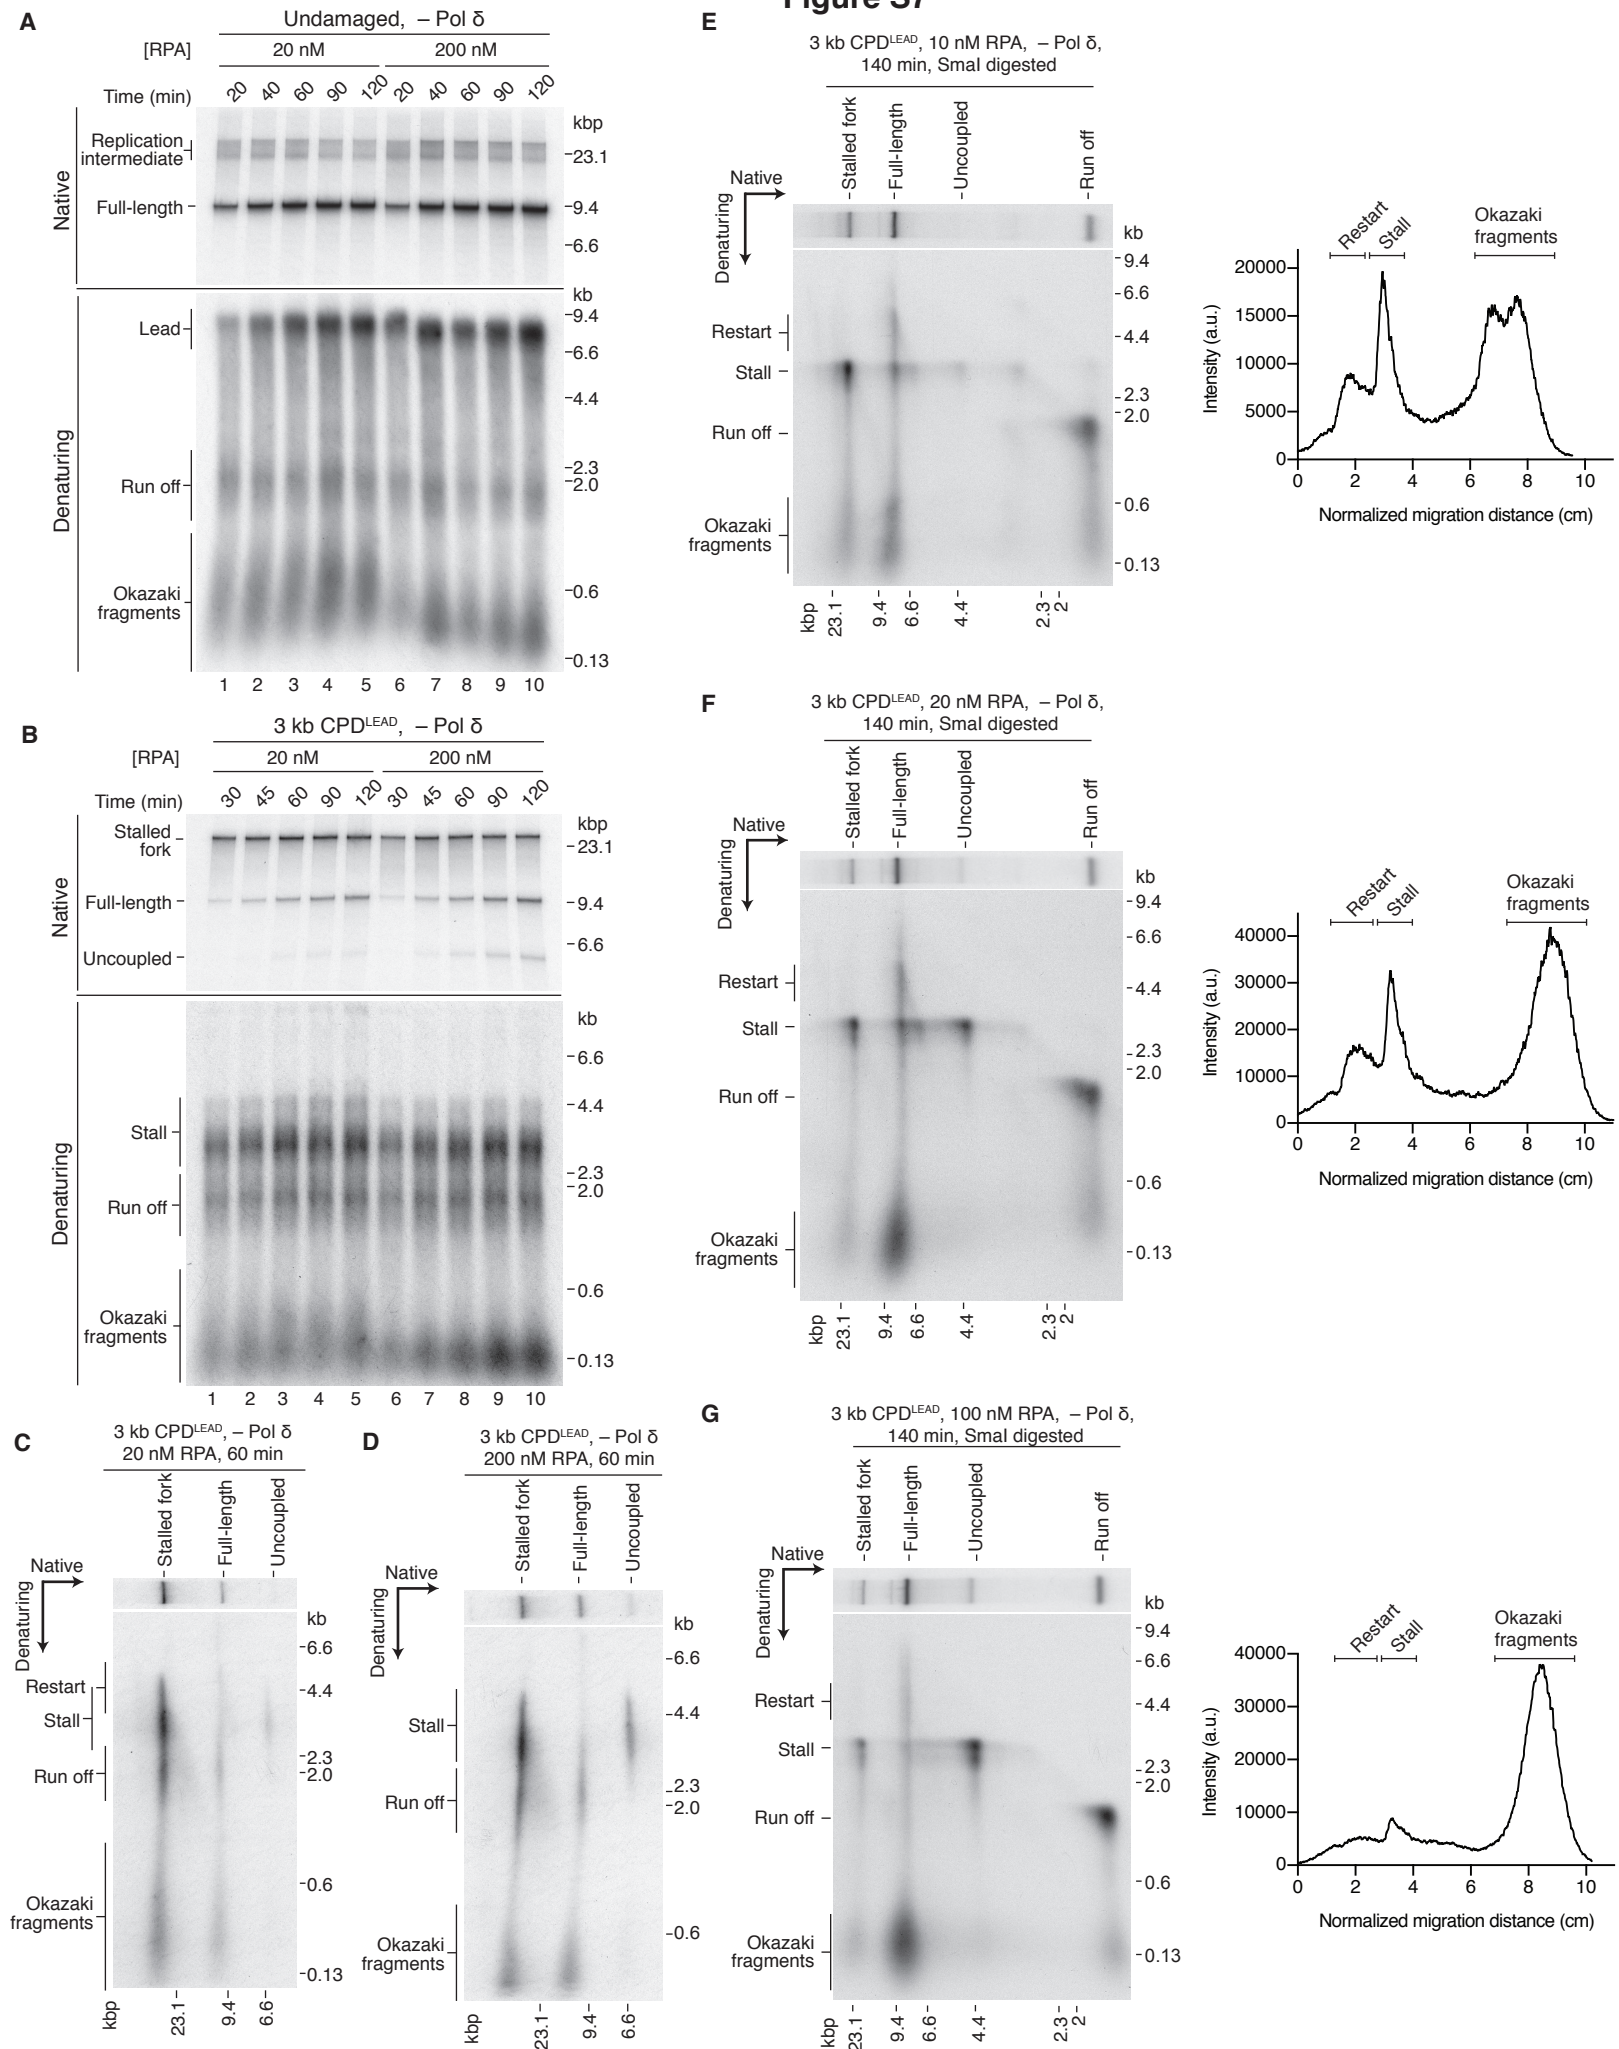

### Figure S1. Related to Figure 1.

(A) Reaction scheme for standard replication reactions.

(B) Analysis of the different steps of replication template preparation. DNA products were separated through a 1% agarose gel in the presence of ethidium bromide. Lane 1: maxi prep starting material; lane 2: after nicking by Nt.BbvCI restriction endonuclease; lanes 3-8: after annealing undamaged, abasic, or CPD oligonucleotides before (lanes 3, 5, 7) and after (lanes 4, 6, 8) ligation by T4 DNA ligase; lanes 9, 11, 13: undamaged, abasic or CPD plasmids after caesium chloride gradient purification; lanes 10, 12, 14: undamaged, abasic or CPD plasmids after digestion with APE 1. BbvCI nicking and oligonucleotide ligation was performed at a site 3 kb left of ARS306 (Ori).

(C) Replication of undamaged and 6.7 kb CPD<sup>LAG</sup> templates in the absence of Pol  $\delta$ . In this and all subsequent experiments entirely lacking Pol  $\delta$  the replication buffer contained 117 mM potassium glutamate. This potassium glutamate concentration was selected because: it supports efficient leading- and lagging-strand synthesis at rates that are comparable to those measured *in vivo* (Yeeles et al., 2017); it was not necessary to use a higher ionic strength buffer to suppress excessive Pol  $\delta$ -dependent strand-displacement synthesis; we reasoned that for subsequent experiments with CPD<sup>LEAD</sup> templates (Figures 3-7), the higher ionic strength (217 mM potassium glutamate) required to suppress Pol  $\delta$  may not have been optimal for leading-strand re-priming.

(D) Micrococcal nuclease digest of a chromatinized undamaged template. Products were separated through a 1.5% native agarose gel and were visualized by ethidium bromide staining.

(E) FACT-dependent replication of a chromatinized undamaged template in the presence of 10 nM Pol  $\delta$ .

(F) Replication of chromatinized undamaged and 6.7 kb CPD<sup>LAG</sup> templates.

### Figure S2. Related to Figure 2.

(A) Standard replication reaction on the 5.1 kb CPD<sup>LAG</sup> template. Products were digested post-replicatively with enzymes mapping at the indicated positions from the CPD.

(B) Undigested replication reaction products for the experiment in Figure 2E.

### Figure S3. Related to Figure 3.

(A and B) Replication reactions on CPD<sup>LEAD</sup> templates performed in the presence (A) and absence (B) of Pol  $\delta$ .

(C) Denaturing gel analysis of the replication reaction in Figure 3C following SmaI digestion.

(D) Replication reaction on the 4.5 kb CPD<sup>LEAD</sup> template at 217 mM potassium glutamate showing that Pol  $\delta$  does not influence uncoupled fork progression downstream of CPD<sup>LEAD</sup>.

(E and F) Two-dimensional gel analysis of experiments performed on undamaged (E) and 3 kb CPD<sup>LEAD</sup> (F) templates in the absence of Pol  $\delta$ . Diagrams of the replication products from the undamaged template are illustrated in (E).

(G) Quantitation of pulse chase experiments on 4.5 kb CPD<sup>LEAD</sup> templates as in Figure 3H, but with the respective contributions of full length and uncoupled products plotted individually (rather than summed as resolved products). Error bars represent the SEM from 4 experiments.

#### **Figure S4. Related to Figure 4.**

(A) Top: schematic of the predicted replication product of leading-strand lesion bypass by re-priming >85 nt from the CPD (3 kb CPD<sup>LEAD</sup> template). The location of the BamHI, PmlI and AgeI restriction sites are illustrated. Bottom: electroeluted DNA from Figure 4B was digested with BamHI, PmlI, AgeI and DpnI and analyzed by native electrophoresis.

(B) Electroeluted DNA from Figure 4B was digested with BamHI, PmlI, AgeI and DpnI and analyzed by two-dimensional electrophoresis.

(C) Replication products from 60 min reactions containing 117 mM potassium glutamate on undamaged or 3 kb CPD<sup>LEAD</sup> templates were quenched, deproteinized and digested with SmaI. Samples were then split and 3% of each was run in a native gel and processed as for standard reactions (analytical). The remaining 97% were run in separate lanes of the same native gel and the full-length bands were excised and electroeluted (preparative).

(D) Replication products from 60 min reactions containing 117 mM potassium glutamate in the presence or absence of the essential firing factor Mcm10 on 3 kb CPD<sup>LEAD</sup> templates were quenched, deproteinized and digested with SmaI. The samples were then split and 2% of each was run in a native gel and processed as for standard reactions (analytical). The remaining 98% were run in separate lanes of the same gel and the full-length bands were excised and electroeluted (preparative).

(E and F) Electroeluted DNA from (D) was digested with BamHI and analyzed by two-dimensional electrophoresis. (D and F) Products generated in the absence of Mcm10 are likely due to replisome-independent template labelling catalyzed by the DNA polymerases in the reaction (Pol  $\alpha$ , Pol  $\delta$  and Pol  $\epsilon$ ).

(B and E) Full-length products (native gel) arising from leading-strand re-priming, together with their constituent stall and restart products (denaturing gel) are shown in red.

#### **Figure S5. Related to Figure 5.**

(A) Schematic illustrating the position of restriction sites for enzymes used to truncate the AhdI-linearized 4.5 kb CPD<sup>LEAD</sup> templates (top), and the products of restriction enzyme digestion (bottom).

(B) Ethidium bromide stained 1% native agarose gel of digested AhdI-linearized 4.5 kb CPD<sup>LEAD</sup> templates.



(C and D) Denaturing gel analysis of the experiments in Figures 5B and C respectively. Stall products from the CPD<sup>LEAD</sup> templates are annotated in red.

(E) Replication reaction of an undamaged template in the presence of the 21 nt re-priming oligonucleotide or its scrambled equivalent.

(F) Comparison of replication on the 3 kb CPD<sup>LEAD</sup> template with re-priming (R) oligonucleotides or scrambled equivalents (S) that anneal at different distances downstream of CPD<sup>LEAD</sup> (– : no oligonucleotide). ‘Gapped full-length’ products are observed with the 1210 nt re-priming oligonucleotide. These products migrate in a distinct position below full-length products due to the size of the ssDNA region between the CPD and re-priming oligonucleotide binding site.

(G) Denaturing gel analysis of the pulse chase experiment in Figure 5F.

**Figure S6. Related to Figure 6.**

(A) Effect of Pol  $\alpha$  concentration on replication of undamaged and 3 kb CPD<sup>LEAD</sup> templates.

(B) Replication reactions on chromatinized undamaged and 3 kb CPD<sup>LEAD</sup> templates.

(C and D) Two-dimensional gel analysis of experiments performed on chromatinized undamaged (C) and 3 kb CPD<sup>LEAD</sup> (D) templates.

**Figure S7. Related to Figure 6.**

(A and B) Replication reactions performed on undamaged (A) and 3 kb CPD<sup>LEAD</sup> templates (B) at 20 nM and 200 nM RPA.

(C and D) Two-dimensional gel analysis of experiments performed at 20 nM RPA (C) and 200 nM RPA (D) on the 3 kb CPD<sup>LEAD</sup> template. Replication products were not digested.

(E-G) Two-dimensional gel analysis of experiments performed with 20 nM Pol  $\alpha$  at 10 nM (E), 20 nM (F) and 100 nM (G) RPA on the 3 kb CPD<sup>LEAD</sup> template. Replication products were digested with SmaI. Lane profiles of the denaturing gel showing the constituents of the full-length products (native) are shown next to each gel.

**Table S1. Oligonucleotides used in this study. Related to the STAR Methods (Key Resources Table).**

| <b>Oligonucleotides</b>                                                                                    |            |     |
|------------------------------------------------------------------------------------------------------------|------------|-----|
| For cloning PstI/BamHI cassette (top): PB_Top:<br>GATCCGCAGTACCAACCTCAGCACTTAAGTCCTCAG<br>CGCAGTACCAACTGCA | This paper | N/A |
| For cloning PstI/BamHI cassette (bottom): PB_Bottom:<br>GTTGGTACTGCGCTGAGGACTTAAGTGCTGAGGTT<br>GGTACTGCG   | This paper | N/A |
| For cloning SphI/Spel cassette (top): SS_Top:<br>CTAGTGCAGTACCAACCTCAGCACTTAAGTCCTCAG<br>CGCAGTACCAAGCATG  | This paper | N/A |
| For cloning SphI/Spel cassette (bottom): SS_Bottom:<br>CTTGGTACTGCGCTGAGGACTTAAGTGCTGAGGTT<br>GGTACTGCA    | This paper | N/A |
| AfIII_undamaged: 5'-phos-TCAGCACTTAAGTCC                                                                   | This paper | N/A |
| AfIII_idSp: 5'-phos-TCAGCACT-/idSp/-AAGTCC                                                                 | This paper | N/A |
| AfIII_CPD: 5'-phos-TCAGCAC-/CPD/-AAGTCC                                                                    | This paper | N/A |
| AfIII_competitor:<br>GTTGGTACTGCGCTGAGGACTTAAGTGCTGAGGTT<br>GGTACTGCG                                      | This paper | N/A |
| SapI_Btn_1:<br>5'-phos-GCTATGTGGTAGGAAGTGAG-biotin-TEG-3'                                                  | This paper | N/A |
| SapI_Btn_2: 5'-biotin-CTCACTTCCTACCACAT-3'                                                                 | This paper | N/A |
| For artificial restart assays: 21 nt re-priming:<br>GGTTGGTACTGCGG                                         | This paper | N/A |
| For artificial restart assays: 21 nt scrambled:<br>GGTGATCGTTCGGG                                          | This paper | N/A |
| For artificial restart assays: 265 nt re-priming:<br>CTGGTTTCCGCCGT                                        | This paper | N/A |
| For artificial restart assays: 265 nt scrambled:<br>GTTGCGCCTTGCCGT                                        | This paper | N/A |
| For artificial restart assays: 1210 nt re-priming:<br>GGCGTCACTACCAC                                       | This paper | N/A |
| For artificial restart assays: 1210 nt scrambled:<br>GCCAGTACTGCAC                                         | This paper | N/A |
| JY180: primase assay:<br>GAATAATGGAAGGGTTAGAACCTACCAT                                                      | This paper | N/A |
